# Supplementary material for: Hierarchical architectures of Co3O4 ultrafine nanowires grown on Co3O4 nanowires with fascinating electrochemical performance
Source: Royal Society of Chemistry journal article supplement (doi:10.1039/c5nj02112j), 2015-11-02
Supplement: c5nj02112j1.pdf [file c5nj02112j1.pdf]

# **Hierarchical architectures of Co<sub>3</sub>O<sub>4</sub> ultrafine nanowires grown on Co<sub>3</sub>O<sub>4</sub> nanowires with fascinating electrochemical performance**

*Lei An<sup>a</sup>, Li Yu<sup>b</sup>, Yunjiu Cao<sup>a,c</sup>, Wenyao Li<sup>a,d</sup>, Kaibing Xu<sup>a</sup>, Tao Ji<sup>a,c</sup>, Rujia Zou<sup>a,e</sup> and Junqing Hu<sup>\*a</sup>*

*<sup>a</sup> State Key Laboratory for Modification of Chemical Fibers and Polymer Materials, College of Materials Science and Engineering, Donghua University, Shanghai 201620, China.*

*<sup>b</sup> Ian Wark Research Institute, University of South Australia, Mawson Lakes, SA 5095, Australia.*

*<sup>c</sup> School of Fundamental Studies, Shanghai University of Engineering Science, Shanghai 201620, China.*

*<sup>d</sup> School of Material Engineering, Shanghai University of Engineering Science, Shanghai 201620, China.*

*<sup>e</sup> Center of Super-Diamond and Advanced Films (COSDAF), Department of Physics and Materials Science, City University of Hong Kong, Hong Kong.*

*E-mail: hu.junqing@dhu.edu.cn*

## Part I: Calculations

The specific capacitance (C) of the electrode was calculated from the discharge curves using the following formula<sup>1</sup>:

$$C = \frac{I \times \Delta t}{m \times \Delta V}$$

where  $I$  (A),  $\Delta t$  (s),  $m$  (g), and  $\Delta V$  (V) are the discharge current, discharge time consumed in the potential range of  $\Delta V$ , mass of the active materials, and the potential windows, respectively.

The energy density (E) and power density (P) are calculated from the discharge curves using the following formula:

$$E = \text{Error!} \times C \times \Delta V^2$$
$$P = \frac{E}{\Delta t}$$

1. J. Yan, E. Khoo, A. Sumboja and P. S. Lee. *ACS Nano*, 2010, **4**, 4247.

## Part II: Supplementary Figures

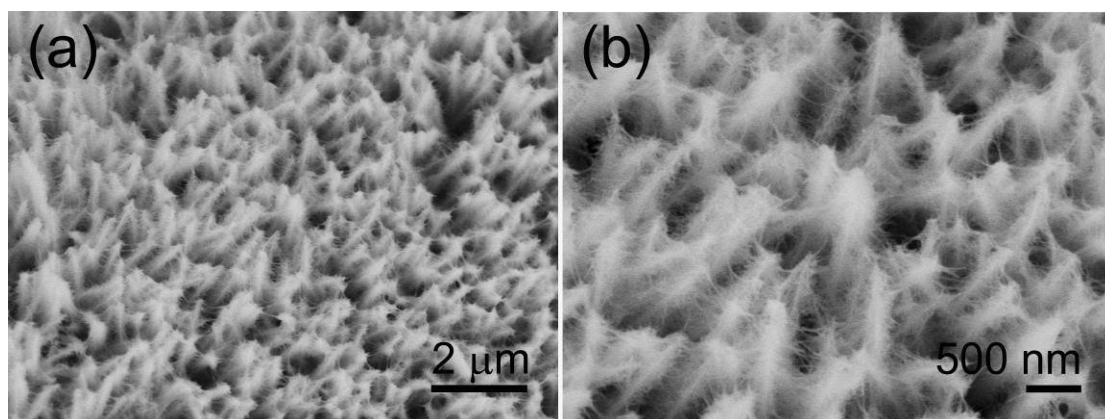

Fig S1 Low- and high- magnification SEM images of the Co-based intermediate.

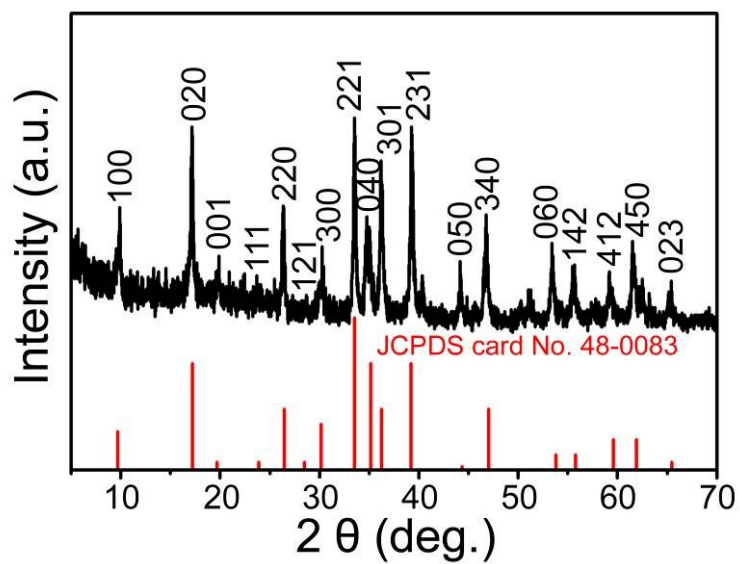

Fig S2 XRD patterns of the as-prepared Co-based intermediate.

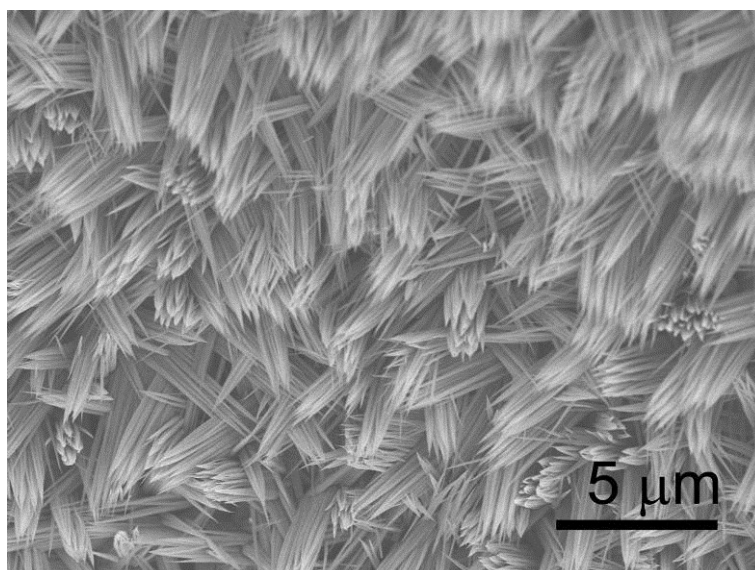

Fig S3 SEM image of the conventional  $\text{Co}_3\text{O}_4$  nanowires.

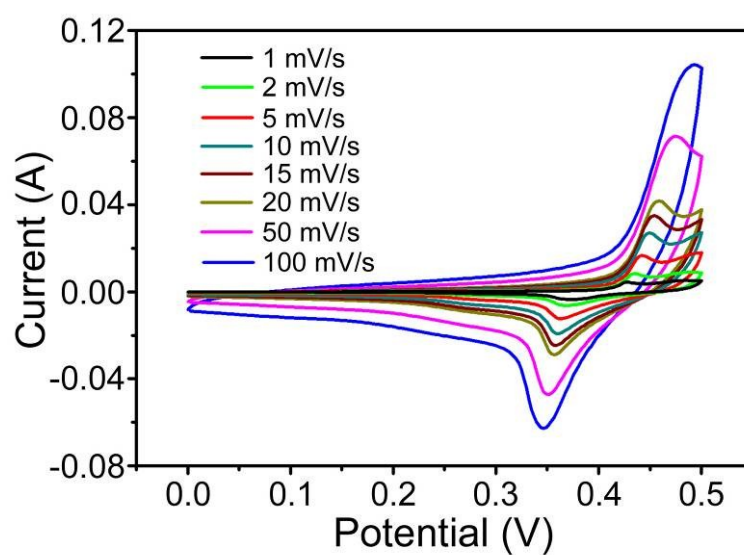

Fig S4 CV curves of the conventional  $\text{Co}_3\text{O}_4$  nanowires at different scan rates, respectively.

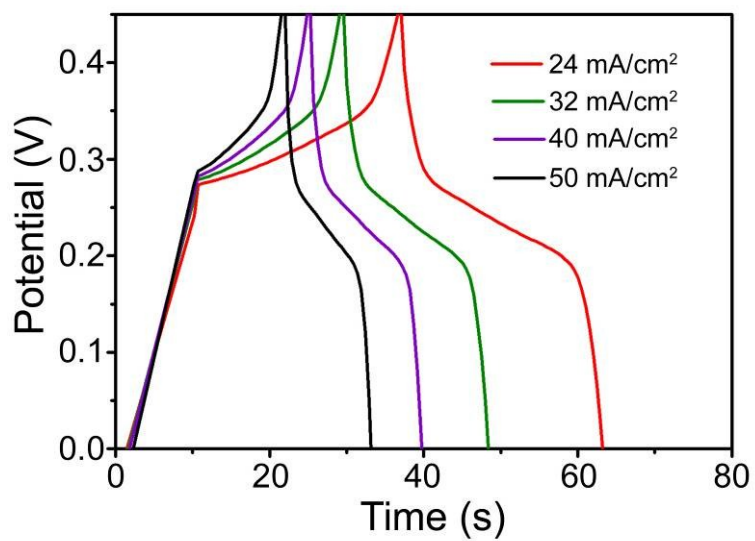

Fig S5 Galvanostatic charge-discharge curves of the Co<sub>3</sub>O<sub>4</sub> nanowires@nanowires at different high current densities, respectively.

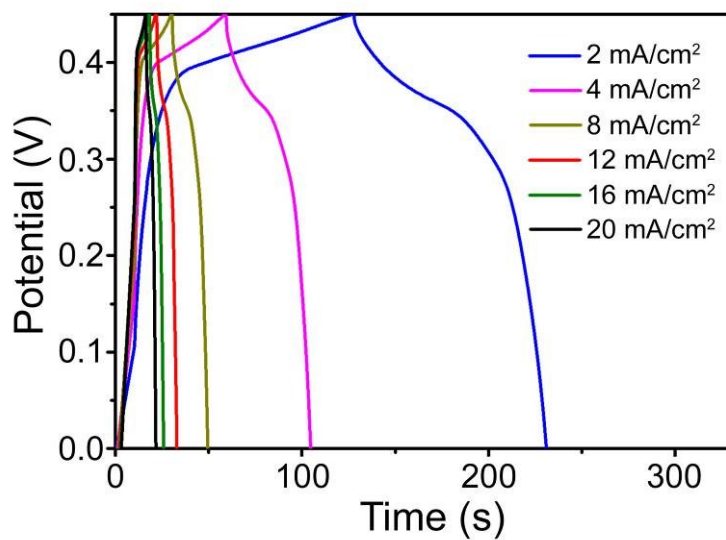

Fig S6 Galvanostatic charge-discharge curves of the conventional Co<sub>3</sub>O<sub>4</sub> nanowires at different current densities, respectively.

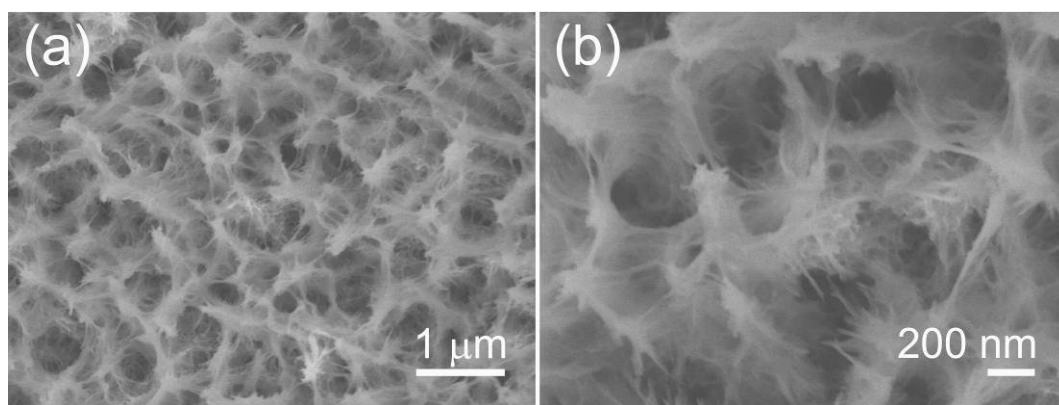

Fig. S7 Different magnification SEM images of the hierarchical  $\text{Co}_3\text{O}_4$  nanowires@nanowires on Ni foam after 10000 cycle CV test.

Table S1 A comparison of the capacitance for the Co<sub>3</sub>O<sub>4</sub> nanowires@ultrafine nanowire electrode material with other reported Co<sub>3</sub>O<sub>4</sub> materials based electrodes in previous literatures.

| Electrode Materials                                                          | Specific Capacitance                                                                                 | Rate Capability                                      | Ref.      |
|------------------------------------------------------------------------------|------------------------------------------------------------------------------------------------------|------------------------------------------------------|-----------|
| Co <sub>3</sub> O <sub>4</sub> nanowires@ultrafine nanowires                 | 1640 F g <sup>-1</sup> at 2mA cm <sup>-2</sup><br>(1640 F g <sup>-1</sup> at 1.7 A g <sup>-1</sup> ) | 66% retention from 2 to 50 mA cm <sup>-2</sup>       | This work |
| Co <sub>3</sub> O <sub>4</sub> nanoparticles                                 | 519 F g <sup>-1</sup> at 0.5 mA cm <sup>-2</sup>                                                     | 25.8% retention from 0.5 to 10 mA cm <sup>-2</sup>   | 18        |
| Dendrite-like Co <sub>3</sub> O <sub>4</sub> nanostructures                  | 207.8 F g <sup>-1</sup> at 0.5 A g <sup>-1</sup>                                                     | 36.1% retention from 0.5 to 6 A g <sup>-1</sup>      | 19        |
| Mesoporous Co <sub>3</sub> O <sub>4</sub> nanocubes                          | 350 F g <sup>-1</sup> at 0.2 A g <sup>-1</sup>                                                       | 45.7% retention from 0.2 to 2 A g <sup>-1</sup>      | 20        |
| Hollow Co <sub>3</sub> O <sub>4</sub> boxes                                  | 278 F g <sup>-1</sup> at 0.5 A g <sup>-1</sup>                                                       | 63.3% retention from 0.5 to 5 A g <sup>-1</sup>      | 37        |
| Co <sub>3</sub> O <sub>4</sub> nanowires                                     | 1217.4 F g <sup>-1</sup> at 0.7 A g <sup>-1</sup>                                                    | 57.5% retention from 0.7 to 20 A g <sup>-1</sup>     | 38        |
| Flower-like Co <sub>3</sub> O <sub>4</sub> microspheres                      | 541.9 F g <sup>-1</sup> at 1 A g <sup>-1</sup>                                                       | 54% retention from 0.7 to 20 A g <sup>-1</sup>       | 39        |
| Nanonet-like Co <sub>3</sub> O <sub>4</sub>                                  | 1084 F g <sup>-1</sup> at 5 mA cm <sup>-2</sup>                                                      | 62.1% retention from 5 to 100 mA cm <sup>-2</sup>    | 40        |
| Co <sub>3</sub> O <sub>4</sub> @MnO <sub>2</sub> nanoflakes                  | 675.9 F g <sup>-1</sup> at 1 A g <sup>-1</sup>                                                       | 26.8% retention from 1 to 10 A g <sup>-1</sup>       | 41        |
| Co <sub>3</sub> O <sub>4</sub> @MnO <sub>2</sub> nanoconch arrays            | 1183.6 F g <sup>-1</sup> at 1 A g <sup>-1</sup>                                                      | 51.6% retention from 1 to 10 A g <sup>-1</sup>       | 42        |
| Co <sub>3</sub> O <sub>4</sub> nanowire@MnO <sub>2</sub> ultrathin nanosheet | 480 F g <sup>-1</sup> at 2.67 A g <sup>-1</sup>                                                      | 55.6% retention from 2.67 to 29.8 A g <sup>-1</sup>  | 43        |
| Hybrid NiO/Co <sub>3</sub> O <sub>4</sub> architectures                      | 193 F g <sup>-1</sup> at 3 A g <sup>-1</sup>                                                         | 60.1% retention from 3 to 8 A g <sup>-1</sup>        | 44        |
| ZnO@Co <sub>3</sub> O <sub>4</sub> core/shell heterostructures               | 857.7 F g <sup>-1</sup> at 2 mA cm <sup>-2</sup>                                                     | 63.4% retention from 2 to 20 mA cm <sup>-2</sup>     | 45        |
| Co <sub>3</sub> O <sub>4</sub> /RGO composites                               | 518.8 F g <sup>-1</sup> at 0.5 A g <sup>-1</sup>                                                     | 47.6% retention from 0.5 to 10 A g <sup>-1</sup>     | 46        |
| Co <sub>3</sub> O <sub>4</sub> /Carbon composites                            | 400 F g <sup>-1</sup> at 0.5 A g <sup>-1</sup>                                                       | 37.5% retention from 0.5 to 5 A g <sup>-1</sup>      | 47        |
| Co <sub>3</sub> O <sub>4</sub> nanoplates/grapheme nanosheets                | 703.4 F g <sup>-1</sup> at 0.625 A g <sup>-1</sup>                                                   | 37.5% retention from 0.625 to 12.5 A g <sup>-1</sup> | 48        |
